# Supplementary material
Source: Elsevier journal article supplement (https://www.sciencedirect.com/science/article/pii/S0300893215000202)

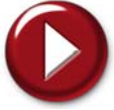

**Material suplementario**

---

**Efecto diferencial de la glucohemoglobina y el tratamiento antidiabético sobre el riesgo de reingreso a 30 días después de un ingreso por insuficiencia cardiaca aguda**

Julio Núñez,<sup>a,\*</sup> Clara Bonanad,<sup>a</sup> Juan Paulo Navarro,<sup>a</sup> Lourdes Bondanza,<sup>a</sup> Ana Artero,<sup>b</sup> Silvia Ventura,<sup>a</sup> Eduardo Núñez,<sup>a</sup> Gema miñana,<sup>a</sup> Juan Sanchis,<sup>a</sup> and José REAL<sup>b</sup>

<sup>a</sup>*Servicio de Cardiología, Hospital Clínico Universitario, INCLIVA, Universitat de Valencia, Valencia, España*

<sup>b</sup>*Servicio de Endocrinología y Nutrición, Hospital Clínico Universitario, INCLIVA, CIBERDEM and Universitat de Valencia, Valencia, España*

---

## SUPPLEMENTARY MATERIAL

Table 1 of Supplementary Material.

Baseline Characteristics According to Treatment With Insulin

| Variables                                 | Insulin-T2DM<br>(n= 343) | Noninsulin-T2DM<br>(n= 492) | P-value |
|-------------------------------------------|--------------------------|-----------------------------|---------|
| <b>Demographic and medical history</b>    |                          |                             |         |
| Age, years                                | 72.8±9.3                 | 72.8±9.7                    | .958    |
| Male, n (%)                               | 155 (45.2)               | 269 (54.7)                  | .007    |
| First admission for AHF, n (%)            | 145 (42.3)               | 253 (51.4)                  | .009    |
| LOS, days*                                | 8 (7)                    | 8 (6)                       | .208    |
| Hypertension, n (%)                       | 303 (88.3)               | 410 (83.3)                  | .044    |
| Dyslipidemia, n (%)                       | 216 (63.0)               | 277 (56.3)                  | .054    |
| Current smoker, n (%)                     | 29 (8.4)                 | 56 (11.4)                   | .169    |
| Previous smoker, n (%)                    | 84 (24.5)                | 120 (24.4)                  | .974    |
| Ischemic heart disease, n (%)             | 188 (54.8)               | 205 (41.7)                  | <.001   |
| Valvular heart disease, n (%)             | 74 (21.6)                | 106 (21.5)                  | .992    |
| Charlson index*                           | 3 (2)                    | 2 (2)                       | <.001   |
| COPD, n (%)                               | 71 (20.7)                | 108 (21.9)                  | .665    |
| PAD, n (%)                                | 66 (19.2)                | 49 (10.0)                   | <.001   |
| Stroke, n (%)                             | 44 (12.8)                | 46 (9.3)                    | .111    |
| Prior known renal failure, n (%)          | 98 (28.6)                | 83 (16.9)                   | <.001   |
| Radiological pleural effusion, n (%)      | 161 (46.9)               | 238 (48.4)                  | .683    |
| Peripheral edema, n (%)                   | 227 (66.2)               | 306 (62.2)                  | .238    |
| <b>Vital signs</b>                        |                          |                             |         |
| Heart rate, bpm                           | 94±23                    | 100±29                      | .003    |
| SBP, mmHg                                 | 152±35                   | 150±36                      | .428    |
| DBP, mmHg                                 | 79±18                    | 82±20                       | .039    |
| <b>Electrocardiogram</b>                  |                          |                             |         |
| Atrial fibrillation, n (%)                | 101 (29.4)               | 197 (40.0)                  | .002    |
| QRS >120 mseg, n (%)                      | 100 (29.1)               | 158 (32.1)                  | .363    |
| <b>Laboratory</b>                         |                          |                             |         |
| Hemoglobin, g/dL                          | 11.9±2.0                 | 12.4±1.9                    | <.001   |
| Leukocyte count, 10 <sup>3</sup> cells/mL | 10405 ± 4504             | 10378 ± 3983                | .928    |
| Fasting glucose, mg/dL                    | 155±82                   | 142±45                      | .007    |
| HbA <sub>1c</sub> , %                     | 7.6±1.4                  | 7.3±1.5                     | .007    |
| Sodium, mEq/L                             | 138±4                    | 138±5                       | .617    |
| NT-proBNP, pg/mL*                         | 3367 (4589)              | 3186 (3951)                 | .199    |
| CA125, U/mL*                              | 57.0 (101.0)             | 58.5 (97.6)                 | .519    |
| Total cholesterol, mg/dL                  | 162±46                   | 164±46                      | .425    |
| Creatinine, mg/dL                         | 1.42±0.76                | 1.27±0.61                   | .001    |
| Urea, mg/dL                               | 73.9±33.8                | 68.2±31.5                   | .013    |
| eGFR, mL/min/1.73 m <sup>2</sup>          | 54.8±23.1                | 61.7±24.0                   | <.001   |
| <b>Echocardiography</b>                   |                          |                             |         |
| LVEF, %                                   | 50.1±15.3                | 49.5±15.3                   | .625    |
| LVDD, mm                                  | 55±9                     | 56±10                       | .054    |
| LAD, mm                                   | 42±7                     | 43±7                        | .434    |
| <b>Medical treatment at discharge</b>     |                          |                             |         |
| Beta-blockers, n (%)                      | 209 (60.9)               | 299 (60.8)                  | .963    |

|                                        |            |            |       |
|----------------------------------------|------------|------------|-------|
| ACEI or ARB, n (%)                     | 236 (68.8) | 352 (71.5) | .393  |
| Aldosterone antagonist blockers, n (%) | 119 (34.7) | 171 (34.8) | .985  |
| Furosemide equivalent dose, mg/day*    | 80 (80)    | 80 (50)    | .001  |
| Sulfonylureas, n (%)                   | 34 (9.9)   | 154 (31.3) | <.001 |
| Meglitinides, n (%)                    | 10 (2.9)   | 34 (6.9)   | .011  |
| Metformin, n (%)                       | 65 (18.9)  | 210 (42.7) | <.001 |
| Glitazones, n (%)                      | 0          | 5 (1.0)    | .061  |
| Alpha glucosidase inhibitors, n (%)    | 3 (0.9)    | 21 (4.3)   | .004  |
| DPP4, n (%)                            | 6 (1.7)    | 32 (6.5)   | .001  |

ACEI, angiotensin converting enzyme inhibitors; AHF, acute heart failure; ARB, angiotensin receptor blockers; bpm, beats per minute; CA125, antigen carbohydrate 125; COPD, chronic pulmonary obstructive disease; DBP, diastolic blood pressure; DPP4, inhibitors of dipeptidyl peptidase 4; eGFR, estimated glomerular filtration rate; HbA1c, glycosylated hemoglobin; IDDM, insulin-dependent diabetes mellitus; Insulin-T2DM, insulin treated type 2 diabetes mellitus; LAD, left atrial diameter; LOS, length of stay; LVEF, left ventricular ejection fraction; LVDD, left ventricular diastolic diameter; NT-proBNP, N-terminal pro-B-type natriuretic peptide; PAD, peripheral artery disease; SBP, systolic blood pressure.

Values for continuous variables are expressed as mean  $\pm$  standard deviation.

\*Value expressed as the median (interquartile range).

**Table 2 of Supplementary Material**

Baseline Characteristics According to Treatment With Drugs That Increased the Risk of Hypoglycemia (Insulin, Sulfonylureas, or Meglitinides)

| Variables                                     | Ins/SU/MG<br>(n=528) | Non-<br>Ins/SU/MG<br>(n=307) | P-value |
|-----------------------------------------------|----------------------|------------------------------|---------|
| <b><i>Demographic and medical history</i></b> |                      |                              |         |
| Age, years                                    | 73.0±9.4             | 72.5±9.7                     | .488    |
| Male, n (%)                                   | 257 (48.7)           | 167 (54.4)                   | .111    |
| First admission for AHF, n (%)                | 242 (45.8)           | 156 (50.8)                   | .165    |
| LOS, days*                                    | 8 (7)                | 8 (6)                        | .374    |
| Hypertension, n (%)                           | 448 (84.8)           | 265 (86.3)                   | .562    |
| Dyslipidemia, n (%)                           | 316 (59.8)           | 177 (57.6)                   | .534    |
| Current smoker, n (%)                         | 47 (8.9)             | 38 (12.4)                    | .109    |
| Previous smoker, n (%)                        | 135 (25.6)           | 69 (22.5)                    | .316    |
| Ischemic heart disease, n (%)                 | 263 (49.8)           | 130 (42.3)                   | .037    |
| Valvular heart disease, n (%)                 | 116 (22.0)           | 64 (20.8)                    | .704    |
| Charlson index*                               | 2 (3)                | 2 (2)                        | <.001   |
| COPD, n (%)                                   | 111 (21.0)           | 68 (22.1)                    | .702    |
| PAD, n (%)                                    | 83 (15.7)            | 32 (10.4)                    | .032    |
| Stroke, n (%)                                 | 61 (11.5)            | 29 (9.4)                     | .344    |
| Prior known renal failure, n (%)              | 132 (25.0)           | 49 (16.0)                    | .002    |
| Radiological pleural effusion, n (%)          | 251 (47.5)           | 148 (48.2)                   | .852    |
| Peripheral edema, n (%)                       | 342 (64.8)           | 191 (62.2)                   | .458    |
| <b><i>Vital signs</i></b>                     |                      |                              |         |
| Heart rate, bpm                               | 96±25                | 99±29                        | .219    |
| SBP, mmHg                                     | 151±35               | 149±35                       | .433    |
| DBP, mmHg                                     | 80±19                | 82±20                        | .110    |
| <b><i>Electrocardiogram</i></b>               |                      |                              |         |
| Atrial fibrillation, n (%)                    | 169 (32.0)           | 129 (42.0)                   | .004    |
| QRS >120 msec, n (%)                          | 156 (29.5)           | 102 (33.2)                   | .267    |
| <b><i>Laboratory</i></b>                      |                      |                              |         |
| Hemoglobin, g/dL                              | 12.0±2.0             | 12.5±1.9                     | .001    |
| Leukocyte count, 10 <sup>3</sup> cells/mL     | 10417±4421           | 10342±3804                   | .803    |
| Fasting glucose, mg/dL                        | 151±73               | 141±43                       | .039    |
| HbA <sub>1c</sub> , %                         | 7.5±1.4              | 7.3±1.5                      | .010    |
| Sodium, mEq/L                                 | 138±4                | 138±5                        | .890    |
| NT-proBNP, pg/mL*                             | 3360 (4236)          | 3131 (3819)                  | .249    |
| CA125, U/mL*                                  | 58.0 (104.0)         | 56.6 (93)                    | .771    |
| Total cholesterol, mg/dL                      | 162±45               | 165±46                       | .441    |

|                                              |            |            |       |
|----------------------------------------------|------------|------------|-------|
| Creatinine, mg/dL                            | 1.37±0.71  | 1.26±0.61  | .023  |
| Urea, mg/dL                                  | 71.7±32.4  | 68.5±32.9  | .176  |
| eGFR, mL/min/1.73 m <sup>2</sup>             | 57.1±23.9  | 61.9±23.6  | .005  |
| <b><i>Echocardiography</i></b>               |            |            |       |
| LVEF, %                                      | 50.4±15.2  | 48.6±15.4  | .104  |
| LVDD, mm                                     | 55±9       | 56±10      | .063  |
| LAD, mm                                      | 43±7       | 42±7       | .734  |
| <b><i>Medical treatment at discharge</i></b> |            |            |       |
| Beta-blockers, n (%)                         | 311 (58.9) | 197 (64.2) | .133  |
| ACEI or ARB, n (%)                           | 366 (69.3) | 222 (72.3) | .361  |
| Aldosterone antagonist blockers, n (%)       | 180 (34.1) | 110 (35.8) | .611  |
| Furosemide equivalent dose, mg/day*          | 80 (80)    | 80 (50)    | .001  |
| Metformin, n (%)                             | 137 (25.9) | 138 (44.9) | <.001 |
| Glitazones, n (%)                            | 3 (0.6)    | 2 (0.6)    | .880  |
| Alpha glucosidase inhibitors, n (%)          | 10 (1.9)   | 14 (4.6)   | .026  |
| DPP4, n (%)                                  | 17 (3.2)   | 21 (6.8)   | .016  |

ACEI, angiotensin converting enzyme inhibitors; AHF, acute heart failure; ARB, angiotensin receptor blockers; bpm, beats per minute; CA125, antigen carbohydrate 125; COPD, chronic pulmonary obstructive disease; DBP, diastolic blood pressure; DPP4, inhibitors of dipeptidyl peptidase 4; eGFR, estimated glomerular filtration rate; HbA1c, glycosylated hemoglobin; LAD, left atrial diameter; LOS, length of stay; LVEF, left ventricular ejection fraction; LVDD, left ventricular diastolic diameter; NT-proBNP, N-terminal pro-B-type natriuretic peptide; PAD, peripheral artery disease; SBP, systolic blood pressure.

Values for continuous variables are expressed as mean ± standard deviation.

\*Value expressed as the median (interquartile range).

**Figure of Supplementary Material.** Flow chart of patients included in this study.

AHF, acute heart failure; DM, diabetes mellitus.

Flow chart

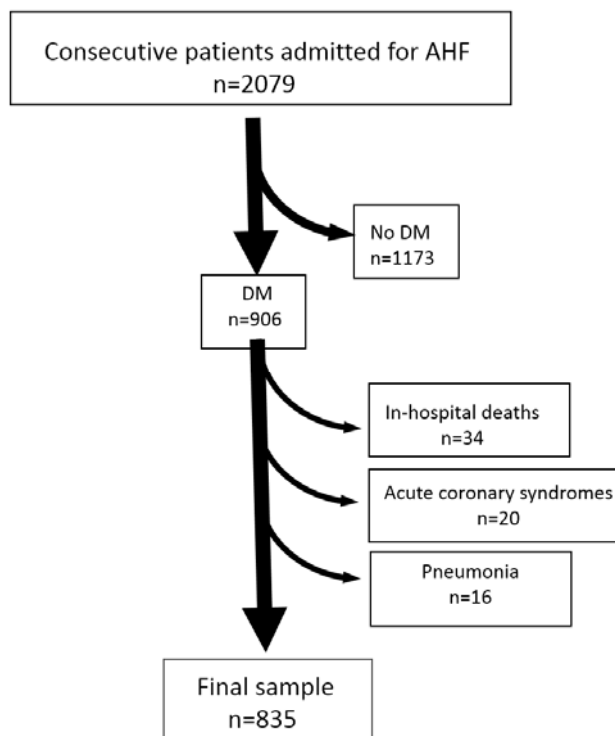

Supplement: mmc1 [file mmc1.pdf]
